# Supplementary material for: Endoscopic improvement of mucosal lesions in patients with moderate to severe ileocolonic Crohn's disease following treatment with certolizumab pegol
Source: PubMed Central journal article supplement — Gut. 2012 Jun 19;62(2):201–8. doi: 10.1136/gutjnl-2012-302262 (PMC3551215; doi:10.1136/gutjnl-2012-302262), 2012-06-19
Supplement: gutjnl-2012-302262s-1.pdf [file gutjnl-2012-302262s-1.pdf]

Supplemental Table 1. Serial Categorical Change in Ulceration Severity

1a. Categorical change in ulceration from Baseline to W10

| Ulceration category at Week 0 | Improvement at Week 10 | No change at Week 10 | Worsening at Week 10 |
|-------------------------------|------------------------|----------------------|----------------------|
| Deep (n=72)                   | 36 (51%)*              | 35 (49%)             | NA                   |
| Superficial (n=6)             | 0                      | 5 (83%)              | 1 (17%)              |

\*32 from deep to superficial and 4 from deep to absent. One patient with deep ulceration had no ulceration observed at Week 10 but could not be categorized as absent because not all segments were evaluated

1b. Categorical change in ulceration from W10 to W54

| Ulceration category at Week 10 | Improvement at Week 54 | No change at Week 54 | Worsening at Week 54 |
|--------------------------------|------------------------|----------------------|----------------------|
| Deep (n=24)                    | 7 (29%)*               | 17 (71%)             | NA                   |
| Superficial (n=25)             | 5 (20%)                | 15 (60%)             | 5 (20%)              |
| None (n=4)                     | NA                     | 2 (50%)              | 2 (50%)†             |

\*All 7 from deep to superficial, †Both from absent to superficial
